# Supplementary material
Source: PubMed Central journal article supplement (PMC3532900)
Supplement: NIHMS415510-supplement-01.pdf [file NIHMS415510-supplement-01.pdf]

# 1 Online Supplement

2

## 3 A. The mechanisms of slip induced on the treadmill

4 During over-ground walking, the velocity of the base of support (BOS) is near stationary  
 5 (its velocity  $\approx 0$ ) during a single stance phase, while the velocity of the body center of  
 6 mass (COM) is in forward direction nearly at a constant level ( $+v_0$ ). (Here the positive  
 7 sign for velocity means that it is in the forward direction, Fig. S-a). The relative velocity  
 8 between the COM and the BOS is  $+v_0 - 0 = v_0$ . In a over-ground slip, the BOS of the  
 9 slipping foot moves with the moveable platform carrying a forward velocity ( $+\Delta v$ ) while  
 10 the body COM still travels with the forward velocity ( $+v_0$ ) (Fig. S-b). (There is little  
 11 change in the absolute velocity of the COM during a slip.) The relative velocity between  
 12 the two is now  $+v_0 - (+\Delta v)$ , or  $v_0 - \Delta v$ . Consequently, it causes the slip disturbance of  $\Delta v$ .

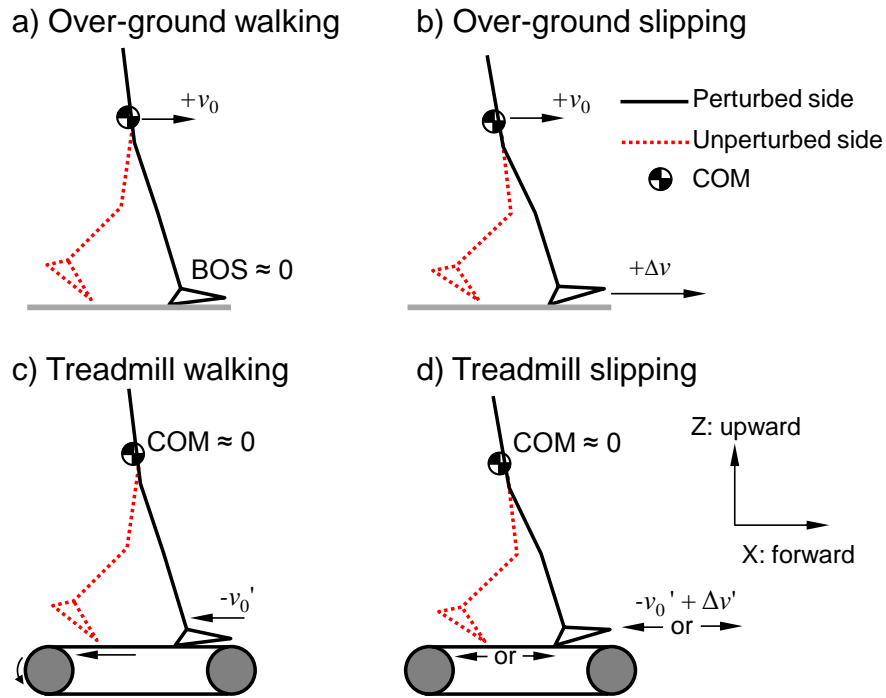

13

14 Fig. S Schematic illustrations of relative velocity of the body center of mass (COM) and  
 15 base of support (BOS) during a) over-ground walking, b) over-ground slipping  
 16 perturbation, c) treadmill walking, and d) treadmill slipping perturbation.

17

1 During a treadmill walking, the body COM absolute velocity is near 0 (Fig. S-c). When  
 2 the treadmill belt moves in the backward direction with stance foot on top of it travelling  
 3 at a constant velocity ( $-v_0'$ , Fig. S-c), the relative velocity between the two is  $0 - (-v_0') =$   
 4  $v_0'$  (Fig. S-c). When the moving belt suddenly gets a forward acceleration that reduces its  
 5 backward velocity by the amount of  $+\Delta v'$ , the belt (or BOS) velocity is now  $(-v_0' + \Delta v')$ .  
 6 We found that when this happens, the absolute COM velocity did little change; that it  
 7 remains  $\approx 0$ . The relative velocity between the two is then  $0 - (-v_0' + \Delta v')$ , or it is equal to  
 8  $v_0' - \Delta v'$  with a slip disturbance of  $\Delta v'$  (Fig. S-d). The treadmill velocity of  $v_0'$  has been  
 9 set in a manner comparable to average walking velocity of  $v_0$ . The treadmill belt  
 10 disturbance of  $\Delta v'$  has therefore an effect comparable to the slip disturbance of  $\Delta v$  during  
 11 over-ground walking.

12

### 13 B. Kinematics of slip induced on the treadmill

14 Each slip trial on treadmill always began with 1.5-s ramp up, followed by an  
 15 approximately 4-second, steady state, moving belt speed ( $v_0$ ) of -1.2 m/s (negative means  
 16 moving backward, Fig. 2c). Based on the average results of the moveable-platform  
 17 kinematics during a slip (Table 2), the initial slip acceleration ( $a$ ) was set at  $12 \text{ m/s}^2$  in the  
 18 perturbation profile first used in the treadmill-slip training (Figs. 2c and 3, Table 2). The  
 19 duration ( $\Delta t$ ) was set at 0.2 s in this and in all profiles. From equation A, the final belt  
 20 moving speed at the end of this perturbation ( $v_f$  at instant D in Fig. 2c) was then 1.2 m/s  
 21 (positive means moving forward), or a *peak slip velocity equivalent* of 2.4 m/s and the  
 22 slip distance ( $l$ ) be 0.24 m.

$$23 \quad \begin{cases} l = \frac{1}{2}(v_f - v_0)\Delta t \\ a = \frac{v_f - v_0}{\Delta t} \end{cases} \quad (\text{A})$$
